# Supplementary material for: Contribution of the Paragenetic Sequence of Clay Minerals to Re-Examination of the Alteration Zoning in the Krafla Geothermal System
Source: MDPI journal article supplement (doi:10.3390/min11090935), 2021-08-27
Supplement: s1 [file s1]

Archive with 1 entries (1 files):
- minerals-1267079-supplementary.pdf
