# Supplementary material for: Contribution of the Paragenetic Sequence of Clay Minerals to Re-Examination of the Alteration Zoning in the Krafla Geothermal System
Source: MDPI journal article supplement (doi:10.3390/min11090935), 2021-08-27
Supplement: s1 [file s1 › minerals-1267079-supplementary.pdf]

---

Article

# Contribution of the Paragenetic Sequence of Clay Minerals to Re-Examination of the Alteration Zoning in the Krafla Geothermal System

David Escobedo <sup>1,2</sup>, Patricia Patrier <sup>2,\*</sup>, Daniel Beaufort <sup>2</sup>, Benoit Gibert <sup>1</sup>, Léa Levy <sup>3</sup>, Nathaniel Findling <sup>4</sup>  
and Annette Mortensen <sup>5</sup>

**Table S1.** Rietveld quantification performed using the BGMN software (for more details, see [40]. Plg/Ol: plagioclases/oligoclase, Px: pyroxene, Smec: smectite, Chl: chlorite, Zeol: zeolite, Laum: laumontite, Wai: wairakite, Pyr: pyrite, Amf/Ep/Pren: amphiboles, epidote, prehnite.

| ID   | Depth m | CEC | meq /100g | Plg/Ol | Px    | Smec  | Chl   | Zeol  | Laum | Wai   | Pyr  | Other sulfides | Iron-Oxides | Titanite | Quartz | Calcite | Amf/Ep/ | Pren | Other |
|------|---------|-----|-----------|--------|-------|-------|-------|-------|------|-------|------|----------------|-------------|----------|--------|---------|---------|------|-------|
| L77  | 405     |     | 22.72     | 11.1%  | 2.4%  | 31.1% | 13.4% | 0.0%  | 0.0% | 1.6%  | 0.0% | 0.1%           | 0.0%        | 0.0%     | 20.8%  | 19.7%   | 0.0%    |      | 0.0%  |
| L80  | 448     |     | 4.91      | 39.5%  | 26.0% | 4.3%  | 10.4% | 0.0%  | 0.0% | 0.0%  | 0.0% | 0.0%           | 0.2%        | 0.0%     | 13.4%  | 0.0%    | 0.0%    |      | 0.2%  |
| L81  | 461.32  |     | 21.00     | 48.1%  | 26.9% | 15.7% | 0.0%  | 0.0%  | 0.0% | 0.0%  | 0.0% | 0.1%           | 2.7%        | 0.0%     | 4.2%   | 0.0%    | 2.3%    |      | 0.0%  |
| L82  | 486.5   |     | 5.75      | 42.1%  | 23.5% | 7.1%  | 17.8% | 0.0%  | 0.0% | 0.0%  | 2.0% | 0.4%           | 0.0%        | 3.7%     | 0.0%   | 3.5%    | 0.0%    |      | 0.0%  |
| L85  | 499     |     | 4.00      | 46.0%  | 33.7% | 9.6%  | 3.6%  | 1.6%  | 0.0% | 0.0%  | 0.0% | 0.0%           | 0.0%        | 5.6%     | 0.0%   | 0.0%    | 0.0%    |      | 0.0%  |
| L86  | 501     |     | 6.48      | 39.2%  | 24.3% | 8.7%  | 7.7%  | 0.0%  | 0.0% | 0.0%  | 0.0% | 0.0%           | 0.0%        | 0.0%     | 17.2%  | 0.0%    | 0.0%    |      | 0.0%  |
| L87  | 508.5   |     | 5.60      | 38.7%  | 31.5% | 7.3%  | 7.7%  | 0.0%  | 0.0% | 0.0%  | 0.0% | 0.0%           | 0.0%        | 5.4%     | 5.1%   | 4.3%    | 0.0%    |      | 0.0%  |
| L89  | 515     |     | 5.10      | 47.9%  | 32.2% | 4.3%  | 11.6% | 0.0%  | 0.0% | 0.0%  | 0.0% | 0.0%           | 0.0%        | 0.0%     | 3.5%   | 0.0%    | 0.0%    |      | 0.0%  |
| L91  | 537.2   |     | 8.40      | 36.8%  | 30.9% | 17.2% | 3.4%  | 0.0%  | 0.0% | 0.0%  | 0.0% | 0.0%           | 0.0%        | 0.0%     | 7.5%   | 4.2%    | 0.0%    |      | 0.0%  |
| L93  | 555     |     | 1.85      | 36.4%  | 22.9% | 0.0%  | 6.5%  | 0.0%  | 0.0% | 0.0%  | 0.0% | 0.6%           | 1.9%        | 4.3%     | 23.6%  | 0.0%    | 3.9%    |      | 0.0%  |
| L95  | 560     |     | 41.43     | 9.3%   | 4.4%  | 42.4% | 0.0%  | 0.0%  | 0.0% | 24.1% | 0.0% | 0.0%           | 0.0%        | 8.6%     | 0.0%   | 0.0%    | 4.1%    |      | 2.6%  |
| L96  | 582.1   |     | 32.50     | 20.4%  | 11.8% | 28.1% | 3.8%  | 3.0%  | 0.0% | 12.7% | 1.1% | 0.0%           | 0.0%        | 8.3%     | 0.9%   | 3.4%    | 6.6%    |      | 0.0%  |
| L97  | 582     |     | 26.74     | 14.5%  | 10.4% | 36.4% | 0.0%  | 0.0%  | 0.0% | 18.4% | 0.0% | 0.0%           | 0.0%        | 6.7%     | 0.1%   | 0.1%    | 7.2%    |      | 4.8%  |
| L99  | 587     |     | 34.00     | 18.6%  | 0.0%  | 27.1% | 12.3% | 27.4% | 0.0% | 0.0%  | 0.0% | 0.0%           | 0.0%        | 8.8%     | 0.0%   | 0.0%    | 4.5%    |      | 1.3%  |
| L100 | 597.5   |     | 33.30     | 17.8%  | 10.5% | 23.9% | 5.8%  | 0.0%  | 0.0% | 18.8% | 1.0% | 0.0%           | 0.5%        | 9.9%     | 1.6%   | 1.4%    | 5.0%    |      | 0.0%  |
| L102 | 622.5   |     | 10.20     | 29.4%  | 5.2%  | 18.3% | 21.6% | 0.0%  | 0.0% | 8.8%  | 0.0% | 0.0%           | 0.0%        | 3.8%     | 0.0%   | 5.8%    | 5.0%    |      | 1.9%  |
| L103 | 707.2   |     | 6.15      | 44.6%  | 19.9% | 5.2%  | 12.0% | 0.0%  | 0.0% | 0.0%  | 0.0% | 0.0%           | 2.2%        | 6.0%     | 3.5%   | 0.0%    | 0.0%    |      | 6.4%  |
| L104 | 724.3   |     | 22.57     | 41.3%  | 33.9% | 17.9% | 0.0%  | 1.3%  | 0.0% | 0.0%  | 0.0% | 0.0%           | 0.0%        | 0.0%     | 4.7%   | 1.0%    | 0.0%    |      | 0.0%  |
| L105 | 727.3   |     | 25.75     | 12.4%  | 5.3%  | 22.8% | 10.8% | 0.0%  | 0.0% | 31.2% | 0.0% | 0.0%           | 2.7%        | 7.0%     | 0.0%   | 0.0%    | 7.9%    |      | 0.0%  |
| L106 | 297.8   |     | 1.04      | 47.9%  | 47.6% | 1.3%  | 0.0%  | 0.0%  | 0.0% | 0.0%  | 0.0% | 0.0%           | 3.2%        | 0.0%     | 0.0%   | 0.0%    | 0.0%    |      | 0.0%  |
| L107 | 305.1   |     | 21.07     | 13.5%  | 0.0%  | 17.8% | 42.9% | 0.0%  | 0.0% | 0.0%  | 0.0% | 0.0%           | 0.4%        | 0.0%     | 17.3%  | 8.1%    | 0.0%    |      | 0.0%  |
| L108 | 338.1   |     | 10.32     | 39.7%  | 31.8% | 19.7% | 3.9%  | 0.0%  | 0.0% | 0.2%  | 0.0% | 0.0%           | 0.0%        | 0.0%     | 3.3%   | 1.5%    | 0.0%    |      | 0.0%  |
| L109 | 350.6   |     | 7.46      | 49.1%  | 27.8% | 14.3% | 3.4%  | 0.0%  | 0.0% | 0.1%  | 0.0% | 0.0%           | 0.0%        | 0.0%     | 2.9%   | 2.5%    | 0.0%    |      | 0.0%  |
| L110 | 356.3   |     | 9.46      | 4.4%   | 6.1%  | 9.9%  | 34.4% | 0.0%  | 0.0% | 0.5%  | 0.3% | 0.0%           | 0.0%        | 0.0%     | 20.6%  | 23.7%   | 0.0%    |      | 0.0%  |
| L111 | 364.5   |     | 7.07      | 42.8%  | 4.4%  | 15.0% | 20.5% | 0.0%  | 0.0% | 0.0%  | 0.5% | 0.0%           | 0.0%        | 0.0%     | 9.3%   | 7.6%    | 0.0%    |      | 0.0%  |
| L112 | 377.7   |     | 6.36      | 40.8%  | 4.3%  | 12.1% | 17.5% | 0.0%  | 0.0% | 0.1%  | 0.1% | 0.0%           | 0.0%        | 0.0%     | 14.4%  | 10.7%   | 0.0%    |      | 0.0%  |
| L113 | 387     |     | 3.59      | 42.8%  | 8.1%  | 8.8%  | 24.1% | 0.0%  | 0.0% | 0.3%  | 0.1% | 0.0%           | 0.0%        | 0.0%     | 9.8%   | 6.1%    | 0.0%    |      | 0.0%  |
| L114 | 394.2   |     | 2.63      | 47.9%  | 20.7% | 5.9%  | 17.0% | 0.0%  | 0.0% | 0.0%  | 0.0% | 0.0%           | 0.0%        | 0.0%     | 4.7%   | 3.9%    | 0.0%    |      | 0.0%  |
| 115  | 403.1   |     | 6.20      | 34.2%  | 2.9%  | 11.0% | 28.9% | 0.0%  | 0.0% | 0.0%  | 0.0% | 0.0%           | 0.0%        | 0.0%     | 12.8%  | 10.3%   | 0.0%    |      | 0.0%  |
